# Supplementary material
Source: ML conference proceedings conference paper supplement (https://openreview.net/forum?id=sLhXMkI0kx)
Supplement: supplementary_material [file attachment]

## 444 A Proofs

445 **Example A.1.** An *affine layer*  $\text{aff} : \mathbb{R}^{d_1 \times d_0 + d_1} \times \mathbb{R}^{d_0 \times N} \rightarrow \mathbb{R}^{d_1 \times N}$  is given by the formula

$$\text{aff}(A, b, X) := AX + b1_N^T. \quad (16)$$

446 A routine calculation shows that

$$J\text{aff}(A, b, X) = A \otimes \text{Id}_N, \quad (17)$$

447 while

$$D\text{aff}(A, b, X) = (\text{Id}_{d_1} \otimes X^T, \text{Id}_{d_1} \otimes 1_N). \quad (18)$$

448 More generally, if  $P : \mathbb{R}^p \rightarrow \mathbb{R}^{d_1 \times d_0}$  denotes any continuously differentiable map, then one obtains  
449 a *P-parameterised affine layer*

$$\text{aff}_P(w, b, X) := \text{aff}(P(w), b, X) = P(w)X + b1_N^T. \quad (19)$$

450 One has

$$J\text{aff}_P(w, b, X) = P(w) \otimes \text{Id}_N \quad (20)$$

451 and, by the chain rule,

$$D\text{aff}_P(w, b, X) = ((\text{Id}_{d_1} \otimes X^T)DP(w), \text{Id}_{d_1} \otimes 1_N), \quad (21)$$

452 where  $DP(w) \in \mathbb{R}^{d_0 \times N \times p}$  is the derivative of  $P$  at  $w$ . Common examples include  $\epsilon$ -*weight normal-*  
453 *isation*  $\text{wn}(w) := (\epsilon + \|w\|_{\text{row}}^2)^{-\frac{1}{2}}w$  [32] and convolutions, which send convolutional kernels to  
454 associated Toeplitz matrices. We will also consider  $\epsilon$ -*entry normalisation*  $\text{en}(w) := (\epsilon + w^2)^{-\frac{1}{2}}w$ ,  
455 with operations applied entrywise.

456 **Example A.2.** A (*parameter-free*) *elementwise nonlinearity*  $\Phi : \mathbb{R}^{d_0 \times N} \rightarrow \mathbb{R}^{d_0 \times N}$  defined by a  
457 continuously differentiable function  $\phi : \mathbb{R} \rightarrow \mathbb{R}$  is given by applying  $\phi$  to every component of a  
458 matrix  $X \in \mathbb{R}^{d_0 \times N}$ . Extension to the parameterised case is straightforward.

459 **Example A.3.** A (*parameter-free*) *batch normalisation (BN) layer*  $\text{bn} : \mathbb{R}^{d_0 \times N} \rightarrow \mathbb{R}^{d_0 \times N}$  is given  
460 by the formula

$$\text{bn}(X) := \frac{X - \mathbb{E}[X]}{\sqrt{\epsilon + \sigma[X]^2}}, \quad (22)$$

461 where  $\epsilon > 0$  is some fixed hyperparameter and  $\mathbb{E}$  and  $\sigma$  denote the row-wise mean and standard deviation.  
462 The parameterised BN layer from [17], with scaling and bias parameters  $\gamma$  and  $\beta$  respectively, is  
463 given simply by postcomposition  $\text{aff}_{\text{diag}}(\gamma, \beta, \cdot) \circ \text{bn}$  with a *diag*-parameterised affine layer (Example  
464 A.1).

465 **Example A.4.** A *residual block*  $f : \mathbb{R}^p \times \mathbb{R}^{d_0 \times N} \rightarrow \mathbb{R}^{d_1 \times N}$  can be defined given any other layer (or  
466 composite thereof)  $g : \mathbb{R}^p \times \mathbb{R}^{d_0 \times N} \rightarrow \mathbb{R}^{d_1 \times N}$  by the formula

$$f(\theta, X) := IX + g(\theta, X), \quad (23)$$

467 where  $I : \mathbb{R}^{d_0 \times N} \rightarrow \mathbb{R}^{d_1 \times N}$  is some linear transformation. In practice,  $I$  is frequently the identity  
468 map [16]; our main theorem will concern the case where  $I$  has all singular values equal to 1.

469 *Proof of Theorem 2.4.* Using the fact that  $D\ell = (D\gamma \circ F) \cdot DF$ , we compute:

$$\begin{aligned} \|\nabla \ell(\theta)\|^2 &= \langle DF(\theta)^T \nabla \gamma(F(\theta)), DF(\theta)^T \nabla \gamma(F(\theta)) \rangle \\ &= \langle \nabla \gamma(F(\theta)), DF(\theta) DF(\theta)^T \nabla \gamma(F(\theta)) \rangle \\ &\geq \lambda(DF(\theta)) \|\nabla \gamma(F(\theta))\|^2 \\ &\geq \mu \lambda(DF(\theta)) \left( \gamma(F(\theta)) - \inf_{\theta'} \gamma(F(\theta')) \right), \end{aligned}$$

470 where the first inequality follows from the standard estimate  $\langle v, AA^T v \rangle \geq \lambda_{\min}(AA^T) \|v\|^2$ , and  
471 the final inequality follows from the fact that  $\gamma$  is  $\mu$ -PL over the set  $\{F(\theta) : \theta \in \mathbb{R}^p\}$ .  $\square$

472 Our proof of Proposition 4.3 requires the following standard lemma.

473 **Lemma A.5.** Let  $\{g_i : \mathbb{R}^p \rightarrow \mathbb{R}^{m_i \times m_{i-1}}\}_{i=1}^n$  be a family of matrix-valued functions. If, with respect  
 474 to some submultiplicative matrix norm, each  $g_i$  is bounded by  $b_i$  and Lipschitz with constant  $c_i$  on a  
 475 set  $S \subset \mathbb{R}^p$ , then their pointwise matrix product  $\theta \mapsto \prod_{i=1}^n g_i(\theta)$  is also bounded and Lipschitz on  $S$ ,  
 476 with bound  $\prod_{i=1}^n b_i$  and Lipschitz constant  $\sum_{i=1}^n c_i (\prod_{j \neq i} b_j)$ .  $\square$

477 *Proof of Lemma A.5.* We prove the lemma by induction. When  $n = 2$ , adding and subtracting a copy  
 478 of  $g_1(\theta)g_2(\theta')$  and using the triangle inequality implies that  $\|g_1g_2(\theta) - g_1g_2(\theta')\|$  is bounded by

$$\|g_1(\theta)(g_2(\theta) - g_2(\theta'))\| + \|(g_1(\theta) - g_1(\theta'))g_2(\theta')\|.$$

479 Applying submultiplicativity of the matrix norm and the bounds provided by the  $b_i$  and  $c_i$  gives

$$\|g_1g_2(\theta) - g_1g_2(\theta')\| \leq (b_1c_2 + b_2c_1)\|\theta - \theta'\|.$$

480 Now suppose we have the result for  $n = k$ . Writing  $\prod_{i=1}^{k+1} g_i$  as  $g_1 \prod_{i=2}^{k+1} g_i$  and applying the above  
 481 argument, the induction hypothesis tells us that  $\prod_{i=1}^{k+1} g_i$  is indeed bounded by  $\prod_{i=1}^{k+1} b_i$  and Lipschitz  
 482 with Lipschitz constant  $\sum_{i=1}^{k+1} c_i (\prod_{j \neq i} b_j)$ . The result follows.  $\square$

483 *Proof of Proposition 4.3.* By Proposition 4.2, it suffices to show that for each  $1 \leq l \leq L$ , the function

$$\vec{\theta} \mapsto \prod_{j=l+1}^L Jf_j(\theta_j, f_{<j}(\vec{\theta}, X)) Df_l(\theta_l, f_{<l}(\vec{\theta}, X)) \quad (24)$$

484 is bounded and Lipschitz on  $S$ . To show this, we must first prove that each map  $\vec{\theta} \mapsto f_{<j}(\vec{\theta}, X)$  is  
 485 bounded and Lipschitz on  $S$ . This we prove by induction.

486 By hypothesis,  $\vec{\theta} \mapsto f_1(\vec{\theta}, X) = f_1(\theta_1, X)$  is bounded and Lipschitz on  $S$ . Suppose now that for  
 487  $j > 1$ , one has  $\vec{\theta} \mapsto f_{<j}(\vec{\theta}, X)$  bounded and Lipschitz on  $S$ . Then the range of  $S \ni \theta \mapsto f_{<j}(\vec{\theta}, X)$   
 488 is a bounded subset of  $\mathbb{R}^{d_j \times N}$ . By hypothesis on  $f_j$ , it then follows that  $\theta \mapsto f_{<j+1}(\vec{\theta}, X) =$   
 489  $f_j(\theta_j, f_{<j}(\vec{\theta}, X))$  is bounded and Lipschitz on  $S$ .

490 The hypothesis on the  $Jf_j$  and  $Df_j$  now implies that the maps  $\vec{\theta} \mapsto Jf_j(\theta_j, f_{<j}(\vec{\theta}, X))$ ,  $l+1 \leq$   
 491  $j \leq L$ , and  $\vec{\theta} \mapsto Df_l(\theta_l, f_{<l}(\vec{\theta}, X))$  are all bounded and Lipschitz on  $S$ . In particular, as a product  
 492 of bounded and Lipschitz functions, the map given in Equation (24) is also bounded and Lipschitz on  
 493  $S$ . Therefore  $DF$  is bounded and Lipschitz on  $S$ .  $\square$

494 *Proof of Corollary 4.4.* By hypothesis,  $F(S)$  is a bounded subset of  $\mathbb{R}^{d_L \times N}$ . Continuity of  $\gamma$  then  
 495 implies that  $\gamma(F(S))$  is a bounded subset of  $\mathbb{R}$ , so that  $F(S)$  is contained in a sublevel set of  $\gamma$ . The  
 496 result now follows from the hypotheses.  $\square$

497 To prove Theorem 4.5 it will be convenient to recall some tensor calculus. If  $f : \mathbb{R}^{n_1 \times n_2} \rightarrow \mathbb{R}^{m_1 \times m_2}$   
 498 is a matrix-valued, differentiable function of a matrix-valued variable, its derivative  $Df$  can be  
 499 regarded as a map  $\mathbb{R}^{n_1 \times n_2} \rightarrow \mathbb{R}^{m_1 \times m_2 \times n_1 \times n_2}$  whose components are given by

$$Df_{j_1, j_2}^{i_1, i_2}(X) = \frac{\partial f_{i_2}^{i_1}}{\partial x_{j_2}^{j_1}}(X), \quad X \in \mathbb{R}^{n_1 \times n_2}$$

500 where  $1 \leq i_\alpha \leq m_\alpha$  and  $1 \leq j_\alpha \leq n_\alpha$  are the indices,  $\alpha = 1, 2$ . It is easily deduced from the  
 501 chain rule of ordinary calculus that if  $f : \mathbb{R}^{n_1 \times n_2} \rightarrow \mathbb{R}^{m_1 \times m_2}$  and  $g : \mathbb{R}^{m_1 \times m_2} \rightarrow \mathbb{R}^{l_1 \times l_2}$  are  
 502 differentiable, then  $g \circ f$  is differentiable with derivative  $(Dg \circ f) \cdot Df : \mathbb{R}^{n_1 \times n_2} \rightarrow \mathbb{R}^{l_1 \times l_2 \times n_1 \times n_2}$ ,  
 503 where here  $\cdot$  denotes contraction over the  $m_1 \times m_2$  indices. The following lemmata then follow from  
 504 routine calculation.

505 **Lemma A.6.** Let  $bn : \mathbb{R}^{d \times N} \rightarrow \mathbb{R}^{d \times N}$  be an  $\epsilon$ -batchnorm layer. Then one can write  $bn = v \circ m$ ,  
 506 where  $v, m : \mathbb{R}^{d \times N} \rightarrow \mathbb{R}^{d \times N}$  are given respectively by

$$v(Y) = (N\epsilon + \|Y\|_{row}^2)^{-\frac{1}{2}} \sqrt{N}Y, \quad (25)$$

507

$$m(X) = X - \frac{1}{N}X1_{N \times N}. \quad (26)$$

508 One has

$$\frac{\partial v_j^i}{\partial y_l^k} = \delta_k^i \sqrt{N} (N\epsilon + \|y^i\|^2)^{-\frac{1}{2}} (\delta_l^j - (N\epsilon + \|y^i\|^2)^{-1} y_l^i y_j^i) \quad (27)$$

509 and

$$\begin{aligned} \frac{\partial^2 v_j^i}{\partial y_n^m \partial y_l^k} &= \delta_k^i \delta_m^i \sqrt{N} (N\epsilon + \|y^i\|^2)^{-\frac{3}{2}} \times \\ &\quad \times (3(N\epsilon + \|y^i\|^2)^{-1} y_n^i y_l^i y_j^i \\ &\quad - (\delta_l^j y_n^i + \delta_n^l y_j^i + \delta_n^j y_l^i)), \end{aligned} \quad (28)$$

510 with

$$\frac{\partial m_j^i}{\partial x_l^k} = \delta_k^i (\delta_l^j - N^{-1}). \quad (29)$$

511 and all second derivatives of  $m$  being zero.  $\square$

512 **Lemma A.7.** Let  $wn : \mathbb{R}^{d_1 \times d_0} \rightarrow \mathbb{R}^{d_1 \times d_0}$  be an  $\epsilon$ -weight normalised parameterisation (Example  
513 A.1). Then one has

$$\frac{\partial wn_j^i}{\partial w_l^k} = \delta_k^i (\epsilon + \|w^i\|^2)^{-\frac{1}{2}} (\delta_l^j - (\epsilon + \|w^i\|^2)^{-1} w_l^i w_j^i) \quad (30)$$

514 and

$$\begin{aligned} \frac{\partial wn_j^i}{\partial w_n^m \partial w_k^l} &= \delta_k^i \delta_m^i (\epsilon + \|w^i\|^2)^{-\frac{3}{2}} \times \\ &\quad \times (3(\epsilon + \|w^i\|^2)^{-1} w_n^i w_l^i w_j^i \\ &\quad - (\delta_l^j w_n^i + \delta_n^l w_j^i + \delta_n^j w_l^i)). \end{aligned} \quad (31)$$

515 Similarly, if  $en : \mathbb{R}^{d_1 \times d_0} \rightarrow \mathbb{R}^{d_1 \times d_0}$  is an  $\epsilon$ -entry-normalised parameterisation, then

$$\frac{\partial en_j^i}{\partial w_l^k} = \delta_k^i \delta_l^j \epsilon (\epsilon + (w_j^i)^2)^{-\frac{3}{2}} \quad (32)$$

516 and

$$\frac{\partial en_j^i}{\partial w_m^n \partial w_l^k} = -\delta_n^i \delta_m^j \delta_k^i \delta_l^j 3\epsilon (\epsilon + (w_j^i)^2)^{-\frac{3}{2}} w_j^i \quad (33)$$

517 *Proof of Theorem 4.5.* (1) follows from continuity of the nonlinearity and its derivative, implying  
518 boundedness of both over bounded sets in  $\mathbb{R}^{d \times N}$ .

519 (2) and (3) follow from a similar argument to the following argument for batch norm, which we give  
520 following Lemma A.6. Specifically, for the composite  $f := \text{bn} \circ \text{aff} : \mathbb{R}^{d_1 \times d_0} \times \mathbb{R}^{d_0 \times N} \rightarrow \mathbb{R}^{d_1 \times N}$   
521 defined by an  $\epsilon$ -BN layer and an affine layer, we will prove that over any set  $B \subset \mathbb{R}^{d_0 \times N}$  consisting  
522 of matrices  $X$  whose covariance matrix is nondegenerate, one has  $f$ ,  $Df$  and  $Jf$  all globally bounded  
523 and Lipschitz. Indeed,  $v$  (Equation (25)) is clearly globally bounded, while  $Dv$  (Equation (27)) is  
524 globally bounded, decaying like  $\|Y\|_{\text{row}}^{-1}$  out to infinity, and  $D^2v$  (Equation (28)) is globally bounded,  
525 decaying like  $\|Y\|_{\text{row}}^{-2}$  out to infinity. Consequently,

$$\text{bn} \circ \text{aff} = v \circ (m \circ \text{aff}),$$

526

$$D(\text{bn} \circ \text{aff}) = (Jv \circ m \circ \text{aff}) \cdot (Jm \circ \text{aff}) \cdot D\text{aff},$$

527

$$J(\text{bn} \circ \text{aff}) = (Jv \circ m \circ \text{aff}) \cdot (Jm \circ \text{aff}) \cdot J\text{aff},$$

528 and similarly the derivatives of  $D(\text{bn} \circ \text{aff})$  and  $J(\text{bn} \circ \text{aff})$  are all globally bounded over  $\mathbb{R}^{d_1 \times d_0} \times B$ .  
529 The hypothesis that  $B$  consist of matrices with nondegenerate covariance matrix is needed here  
530 because while  $Jv \circ m \circ \text{aff}$  decays like  $\|A(X - \mathbb{E}[X])\|_{\text{row}}^{-1}$  out to infinity, the row-norm  $\|(A(X -$   
531  $\mathbb{E}[X]))^i\|^2 = (A^i(X - \mathbb{E}[X])(X - \mathbb{E}[X])^T (A^i)^T) = \|A^i\|_{\text{Cov}(X)}^2$  can only be guaranteed to increase  
532 with  $A$  if  $\text{Cov}(X)$  is nondegenerate. Thus, for instance, without the nondegeneracy hypothesis on  
533  $\text{Cov}(X)$ ,  $A \mapsto J(\text{bn} \circ \text{aff})(A, X)$  grows unbounded like  $J\text{aff}(A, X) = A \otimes \text{Id}_N$  in any direction of

degeneracy of  $\text{Cov}(X)$ . Nonetheless, with the nondegenerate covariance assumption on elements of  $B$ ,  $\text{bn} \circ \text{aff}$  satisfies the hypotheses of Proposition 4.3 over  $\mathbb{R}^{d_1 \times d_0} \times B$ .

(2) and (3) now follow from essentially the same boundedness arguments as for batch norm, using Lemma A.7 in the place of Lemma A.6. However, since the row norms in this case are always defined by the usual Euclidean inner product on row-vectors, as opposed to the possibly degenerate inner product coming from the covariance matrix of the input vectors, one does not require any hypotheses aside from boundedness on the set  $B$ . Thus entry- and weight-normalised affine layers satisfy the hypotheses of Proposition 4.3.

Finally, (5) follows from the above arguments. More specifically, if  $g : \mathbb{R}^p \times \mathbb{R}^{d \times N} \rightarrow \mathbb{R}^{d \times N}$  is any composite of layers of the above form, then  $g$  satisfies the hypotheses of Proposition 4.3. Consequently, so too does the residual block  $f(\theta, X) := X + g(\theta, X)$ , for which  $Jf(\theta, X) = \text{Id}_d \otimes \text{Id}_N + Jg(\theta, X)$  and  $Df(\theta, X) = Dg(\theta, X)$ .

□

*Proof of Proposition 4.6.* In the notation of Proposition 4.2, the product  $DF(\vec{\theta})DF(\vec{\theta})^T$  is the sum of the positive-semidefinite matrices  $D_{\theta_i} F(\vec{\theta}) D_{\theta_i} F(\vec{\theta})^T$ . Therefore  $\lambda(DF(\vec{\theta})) \geq \sum_i \lambda(D_{\theta_i} F(\vec{\theta}))$ . The result now follows from the inequality  $\lambda(AB) \geq \lambda(A)\lambda(B)$  applied inductively using Equation (11). Note that  $\lambda(AB) \geq \lambda(A)\lambda(B)$  is either trivial if one or both of  $A$  and  $B$  have more rows than columns (in which case the right hand side is zero), and follows from the well-known inequality  $\sigma(AB) \geq \sigma(A)\sigma(B)$  for the smallest singular values if both  $A$  and  $B$  have at least as many columns as rows.

Theorem 4.7 follows from the following two lemmata.

**Lemma A.8.** *Let  $g : \mathbb{R}^p \times \mathbb{R}^{d_0 \times N} \rightarrow \mathbb{R}^{d_1 \times N}$  be a layer for which there exists  $\delta > 0$  such that  $\|Jg(\theta, X)\|_2 < (1 - \delta)$  for all  $\theta$  and  $X$ . Let  $I : \mathbb{R}^{d_0 \times N} \rightarrow \mathbb{R}^{d_1 \times N}$  be a linear map whose singular values are all equal to 1. Then the residual block  $f(\theta, X) := IX + g(\theta, X)$  has  $\sigma(Jf(\theta, X)) > \delta$  for all  $\theta$  and  $X$ .*

*Proof.* Observe that

$$Jf(\theta, X) = I \otimes \text{Id}_N + Jg(\theta, X). \quad (34)$$

The result then follows from Weyl's inequality: all singular values of  $I \otimes \text{Id}_N$  are equal to 1, so that

$$\sigma(Jf(\theta, X)) \geq 1 - \|Jg(\theta, X)\|_2 > \delta$$

for all  $\theta$  and  $X$ . □

**Lemma A.9.** *Let  $P : \mathbb{R}^p \rightarrow \mathbb{R}^{d_1 \times d_0}$  be a parameterisation. Then*

$$\sigma(D\text{aff}_P(w, X)) \geq \sigma(X)\sigma(DP(w)) \quad (35)$$

for all  $w \in \mathbb{R}^p$  and  $X \in \mathbb{R}^{d_0 \times N}$ .

*Proof.* Follows from Equation (21) and the inequality  $\sigma(AB) \geq \sigma(A)\sigma(B)$ . □

*Proof of Theorem 4.7.* Hypothesis 1 in Theorem 4.7 says that the residual branches of the  $f_l$ ,  $l \geq 2$ , satisfy the hypotheses of Lemma A.8, so that  $\sigma(Jf_l(\theta_l, f_{<l}(\vec{\theta}, X))) > 0$  for all  $l \geq 2$ . By the assumption that  $d_{l-1} \geq d_l$ , this means that  $\lambda(Jf_l(\theta_l, f_{<l}(\vec{\theta}, X))) = \sigma(Jf_l(\theta_l, f_{<l}(\vec{\theta}, X)))^2 > 0$ . On the other hand, hypothesis 2 together with Lemma A.9 implies that  $\lambda(Df_1(\theta_1, X)) \geq \sigma(Df_1(\theta_1, X))^2 > 0$ . The result now follows from Proposition 4.6. □

.

*Proof of Theorem 5.1.* By Theorem 4.5, all layers satisfy the Hypotheses of Proposition 4.3 and so by Corollary 4.4, the associated loss function is globally Lipschitz, with Lipschitz constant some  $\beta > 0$ . Take  $\eta > 0$  to be any number smaller than  $2\beta^{-1}$ ; thus the loss can be guaranteed to be decreasing with every gradient descent step.

We now show that the network satisfies the hypotheses of Theorem 4.7. The dimension constraints in item (1) are encoded directly into the definition of the network, while the operator-norm of each of the residual branches, as products of  $P(w)$  and  $D\Phi$  matrices, are globally bounded by 1 by our hypotheses on these factors. For item (2), our data matrix is full-rank since it consists of linearly independent data, while by definition we have  $p_1 = d_1 d_0$  with  $Df_1 = D\text{aff}_{\text{en}}$  being everywhere full-rank since  $\epsilon$ -entry-normalisation is a diffeomorphism onto its image for any  $\epsilon > 0$ . Its hypotheses being satisfied by our weight-normalised residual network, Theorem 4.7 implies the parameter-function map  $F$  associated to  $\{f_l\}_{l=1}^L$  and  $X$  satisfies  $\lambda(DF(\vec{\theta})) = \sigma(DF(\vec{\theta}))^2 > 0$  for all parameters  $\vec{\theta}$ . There are now two cases to consider.

In the first case, the gradient descent trajectory never leaves some ball of finite radius in  $\mathbb{R}^{d_1 \times d_0}$ , the parameter space for the first layer. In any such ball, recalling that the first layer's parameterisation is entry-normalisation (Example A.1), the smallest singular value

$$\sigma(D \text{en}(w)) = \min_{1 \leq i \leq d_1, 1 \leq j \leq d_0} \frac{\epsilon}{(\epsilon + (w_j^i)^2)^{\frac{3}{2}}} \quad (36)$$

of  $D \text{en}(w)$  is uniformly lower bounded by some positive constant. Thus by Lemmas A.9 and A.8<sup>7</sup>, the smallest singular value of  $DF$  is also uniformly lower bounded by a positive constant in any such ball. It follows from Theorem 2.4 that the loss satisfies the PL-inequality over such a ball, so that gradient descent converges in this case at a linear rate to a global minimum.

The second and only other case that must be considered is when for each  $R > 0$ , there is some time  $T$  for which the weight norm  $\|w_t\|$  of the parameters in the first layer is greater than  $R$  for all  $t \geq T$ . That is, the parameter trajectory in the first layer is unbounded in time. In this case, inspection of Equation (36) reveals that the smallest singular value of  $DF$  *cannot* be uniformly bounded below by a positive constant over all of parameter space. Theorem 2.4 then says that there is merely a sequence  $(\mu_t)_{t \in \mathbb{N}}$ , with  $\mu_t$  proportional to  $\sigma(D \text{en}(w_t))$ , for which

$$\ell_t - \ell^* \leq \prod_{i=0}^t (1 - \mu_i \alpha) (\ell_0 - \ell^*), \quad (37)$$

where  $\alpha = \eta(1 - 2\beta^{-1}\eta) > 0$ . To guarantee convergence in this case, therefore, it suffices to show that  $\prod_{t=0}^{\infty} (1 - \mu_t \alpha) = 0$ ; equivalently, it suffices to show that the infinite series

$$\sum_{t=0}^{\infty} \log(1 - \mu_t \alpha) \quad (38)$$

diverges.

The terms of the series (38) form a sequence of negative numbers which converges to zero. Hence, for the series (38) to diverge, it is *necessary* that  $\mu_t$  decrease *sufficiently slowly* with time. By the integral test, therefore, it suffices to find an integrable function  $m : [t_0, \infty) \rightarrow \mathbb{R}_{\geq 0}$  such that  $\mu_t \geq m(t)$  for each integer  $t \geq t_0$ , for which the integral  $\int_{t_0}^{\infty} \log(1 - m(t)\alpha) dt$  diverges.

We construct  $m$  by considering the worst possible case: where each gradient descent step is in exactly the same direction going out to  $\infty$ , thereby decreasing  $\sigma(D \text{en}(w))$  at the fastest possible rate. By applying an orthogonal-affine transformation to  $\mathbb{R}^{d_1 d_0}$ , we can assume without loss of generality that the algorithm is initialised at, and consistently steps in the direction of, the first canonical basis vector  $e_1$  in  $\mathbb{R}^{d_1 d_0}$ . Specifically, letting  $\vec{\theta}$  be the vector of parameters for all layers following the first and  $w \in \mathbb{R}^{d_1 d_0}$  the first layer parameters, for  $r \in \mathbb{R}_{\geq 1}$  we may assume that

$$\nabla_w \ell(\vec{\theta}, re_1) = \partial_{w_1} \ell(\vec{\theta}, re_1) e_1, \quad (39)$$

with  $\partial_{w_1} \ell(\vec{\theta}, re_1) \geq 0$  for all  $(\vec{\theta}, r)$ . Let  $\gamma$  denote the convex function defined by the cost  $c$  (cf. Equation (6)), and let  $A(\vec{\theta}, re_1)$  denote the  $d_1 d_0$ -dimensional row vector

$$D\gamma(F(\vec{\theta}, re_1)) \prod_{l=2}^L Jf_l(\theta_l, f_{<l}((\vec{\theta}, re_1), X)) (\text{Id}_{d_1} \otimes X^T). \quad (40)$$

<sup>7</sup>See the supplementary material.

Then, in this worst possible case, the single nonzero partial derivative defining the loss gradient with respect to  $w$  at the point  $(\vec{\theta}, re_1)$  is given by

$$\partial_{w_1} \ell(\vec{\theta}, re_1) = A(\vec{\theta}, re_1)_1 \frac{\epsilon}{(\epsilon + r^2)^{\frac{3}{2}}}, \quad (41)$$

where  $A(\vec{\theta}, re_1)_1$  denotes the first component of the row vector  $A(\vec{\theta}, re_1)$  (cf. Equation (21)). By Theorem 4.5, however, the magnitude of  $A(\vec{\theta}, re_1)$  can be globally upper bounded by some constant  $C$ . Thus

$$\partial_{w_1} \ell(\vec{\theta}, re_1) \leq \frac{C\epsilon}{(\epsilon + r^2)^{\frac{3}{2}}} \leq \frac{C\epsilon}{r^3} \quad (42)$$

for all  $\vec{\theta}$  and  $r \geq 1$ .

Let us therefore consider the Euler method, with step size  $\eta$ , applied over  $\mathbb{R}_{\geq 1}$ , starting from  $r_0 = 1$ , with respect to the vector field  $V(r) = C\epsilon r^{-3}$ . Labelling the iterates  $(r_t)_{t \in \mathbb{N}}$ , we claim that there exist constants  $\gamma_1, \gamma_2$  and  $\gamma_3$  such that  $0 < r_t \leq \gamma_1 + \gamma_2(t + \gamma_3)^{\frac{1}{4}}$  for all  $t \in \mathbb{N}$ . Indeed, observe that the solution to the flow equation  $\dot{r}(t) = C\epsilon r(t)^{-3}$  is  $r(t) = (4C\epsilon t + 1)^{\frac{1}{4}}$ , so the claim follows if we can show that there exists a constant  $B$  such that  $|r_t - r(t)| < B$  for all integer  $t \geq 0$ . However this follows from Theorem 10.6 of [14].

Now, since for each  $t$ ,  $r_t$  is an upper bound for the magnitude of the parameter vector  $w_t \in \mathbb{R}^{d_1 d_0}$ , we see from Equation (36) that the smallest singular value  $\sigma(\text{Den}(w_t))$  admits the lower bound

$$\sigma(\text{Den}(w_t)) \geq \frac{\epsilon}{(\epsilon + (\gamma_1 + \gamma_2(t + \gamma_3)^{\frac{1}{4}})^2)^{\frac{3}{2}}} \quad (43)$$

for all  $t \in \mathbb{N}$ . Clearly,  $(\epsilon + (\gamma_1 + \gamma_2(t + \gamma_3)^{\frac{1}{4}})^2)^{\frac{3}{2}} = O(t^{\frac{3}{4}})$ . Hence there exist  $t_0 > 0$  and  $\Gamma > 0$  such that

$$\mu_t \geq \frac{\Gamma}{t^{\frac{3}{4}}} \quad (44)$$

for all integer  $t \geq t_0$ . Then, setting  $m(t) := \Gamma t^{-\frac{3}{4}}$ , the integral

$$\int_{t_0}^{\infty} \log(1 - m(t)\alpha) dt = \int_{t_0}^{\infty} \log\left(\frac{t^{\frac{3}{4}} - \Gamma\alpha}{t^{\frac{3}{4}}}\right) dt \quad (45)$$

diverges. It follows that gradient descent converges as  $t \rightarrow \infty$  to a global minimum.  $\square$

## A.1 Experimental details

For all our experiments, the data was standardised channel-wise using the channel-wise mean and standard deviation over the training set.

On ImageNet, the models were trained using the default PyTorch ImageNet example<sup>8</sup>, using SGD with weight decay of  $1e - 4$  and momentum of 0.9, batch size of 256, and random crop/horizontal flip data augmentation. The test accuracies obtained were  $74.22 \pm 0.14$  for the standard network, and  $74.82 \pm 0.04$  for the modified network.

On CIFAR10/100, our models<sup>9</sup> were trained using SGD with a batch size of 128 and random crop/horizontal flip data augmentation. We ran 10 trials over each of the learning rates 0.2, 0.1, 0.05 and 0.02. The only exception to this is for CIFAR10 with a learning rate of 0.2, where training diverged 6 out of 10 times on the original network, so we plotted only those 4 trials where training did not diverge. Mean and standard deviation test accuracies, as well as averaged-over-final epoch loss values, are given in Tables 1 and 2.

The plots at the optimal learning rate, 0.1 for CIFAR10 and 0.05 for CIFAR100, are in Figure 3, while we provide the plots for the other learning rates in Figures 4 and 5.

While Hypothesis 6.1 is clearly validated at all learning rates on CIFAR100, it holds to lessening extents on CIFAR10 as learning rate is decreased. Ultimately, the modified version ends up achieving a slightly *higher* loss at the end of training with the smallest learning rate, suggesting that Hypothesis 6.1 should not be invoked too far from initialisation.

<sup>8</sup><https://github.com/pytorch/examples/tree/main/imagenet>

<sup>9</sup>minimally modifying <https://github.com/kuangliu/pytorch-cifar>

Table 1: ResNet18 on CIFAR10

| Learning rate | Original          |                     | Modified         |                     |
|---------------|-------------------|---------------------|------------------|---------------------|
|               | Test accuracy     | Final loss          | Test accuracy    | Final loss          |
| 0.2           | $48.14 \pm 19.95$ | $1.3883 \pm 0.5503$ | $62.71 \pm 6.14$ | $0.9495 \pm 0.2150$ |
| 0.1           | $91.64 \pm 0.24$  | $0.0032 \pm 0.0002$ | $91.42 \pm 0.61$ | $0.0022 \pm 0.0002$ |
| 0.05          | $91.22 \pm 0.25$  | $0.0043 \pm 0.0003$ | $91.14 \pm 0.25$ | $0.0041 \pm 0.0001$ |
| 0.02          | $89.50 \pm 0.32$  | $0.0112 \pm 0.0004$ | $88.94 \pm 0.35$ | $0.0125 \pm 0.0004$ |

Table 2: ResNet18 on CIFAR100

| Learning rate | Original         |                     | Modified         |                     |
|---------------|------------------|---------------------|------------------|---------------------|
|               | Test accuracy    | Final loss          | Test accuracy    | Final loss          |
| 0.2           | $69.67 \pm 0.58$ | $0.0150 \pm 0.0005$ | $70.07 \pm 0.53$ | $0.0115 \pm 0.0005$ |
| 0.1           | $70.05 \pm 0.43$ | $0.0147 \pm 0.0004$ | $70.87 \pm 0.42$ | $0.0116 \pm 0.0003$ |
| 0.05          | $70.04 \pm 0.48$ | $0.0145 \pm 0.0003$ | $70.34 \pm 0.56$ | $0.0116 \pm 0.0003$ |
| 0.02          | $69.75 \pm 0.56$ | $0.0145 \pm 0.0003$ | $70.13 \pm 0.55$ | $0.0116 \pm 0.0004$ |

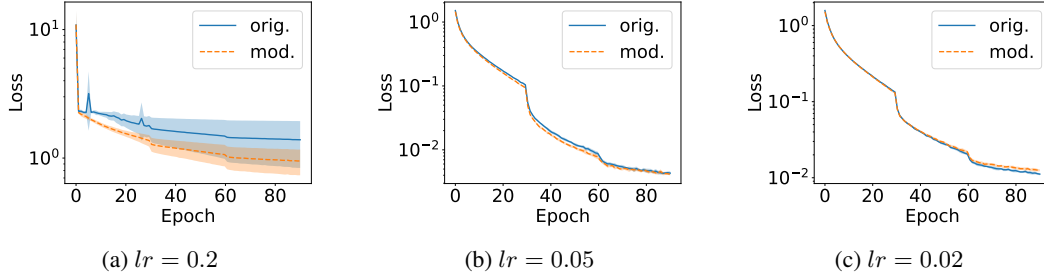

Figure 4: Loss plots for ResNet18 on CIFAR10

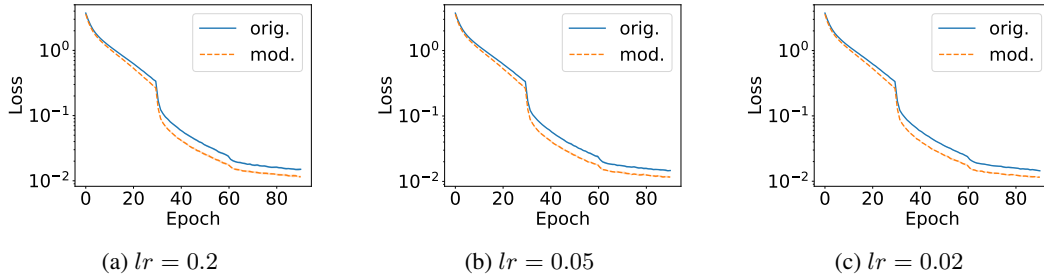

Figure 5: Loss plots for ResNet18 on CIFAR100
